# Supplementary material
Source: Springer Nature journal article supplement (https://www.springermedizin.de/resource/supplementary/12943_2014_1463_MOESM4_ESM.pdf/9553068)

A

IPP

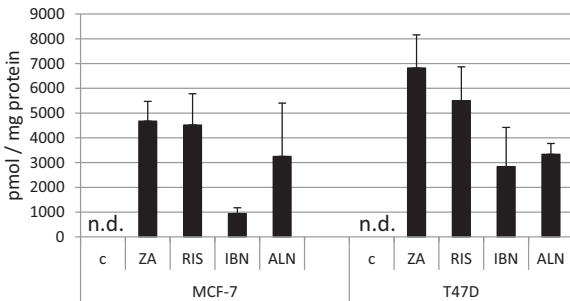

B

Apppl

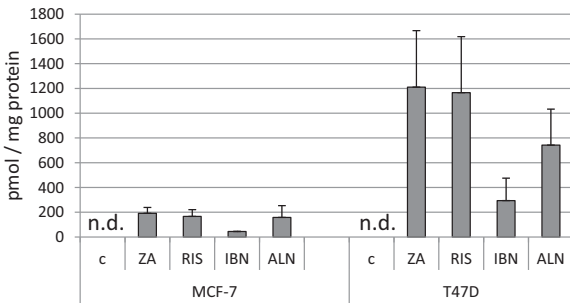

Supplement: MOESM4 [file 9553068]
